# Supplementary material for: 3D hierarchical Co3O4@Co3S4 nanoarrays as cathode materials for asymmetric pseudocapacitors
Source: Royal Society of Chemistry journal article supplement (doi:10.1039/c5ta09344a), 2016-01-01
Supplement: c5ta09344a1.pdf [file c5ta09344a1.pdf]

## Supporting information

### **3D hierarchical $\text{Co}_3\text{O}_4@\text{Co}_3\text{S}_4$ nanoarrays as cathode materials for asymmetric pseudocapacitor**

Bo Liu,<sup>‡a</sup> Dezhi Kong,<sup>‡a,b</sup> Ye Wang,<sup>a</sup> Jun Zhang,<sup>c</sup> Tupei Chen,<sup>c</sup> Chuanwei Cheng,<sup>b</sup> and Hui Ying Yang<sup>a,\*</sup>

<sup>a</sup> Pillar of Engineering Product Development, Singapore University of Technology and Design, 8 Somapah Road, Singapore, 487372

<sup>b</sup> Shanghai Key Laboratory of Special Artificial Microstructure Materials and Technology, School of Physics Science and Engineering, Tongji University, Shanghai 200092, P. R. China

<sup>c</sup> School of Electrical and Electronic Engineering, Nanyang Technological University, Singapore 639798, Singapore

<sup>‡</sup> These authors contribute equally to this work.

\*Corresponding author. Tel.: +65 6303 6663; Fax: +65 6779 5161. E-mail address: yanghuiying@sutd.edu.sg (H. Y. Yang)

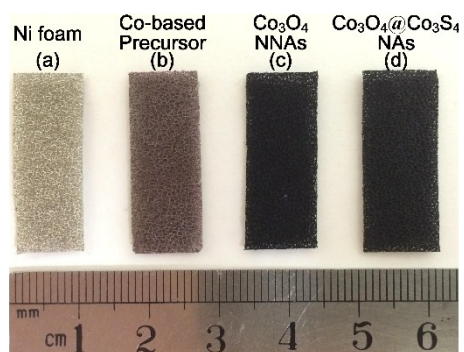

**Figure S1** Optical photograph of Ni foam substrate (a), Co-based precursor on Ni foam (b), Co<sub>3</sub>O<sub>4</sub> NNAs on Ni foam (c), and Co<sub>3</sub>O<sub>4</sub>@Co<sub>3</sub>S<sub>4</sub> NNAs on Ni foam (d).

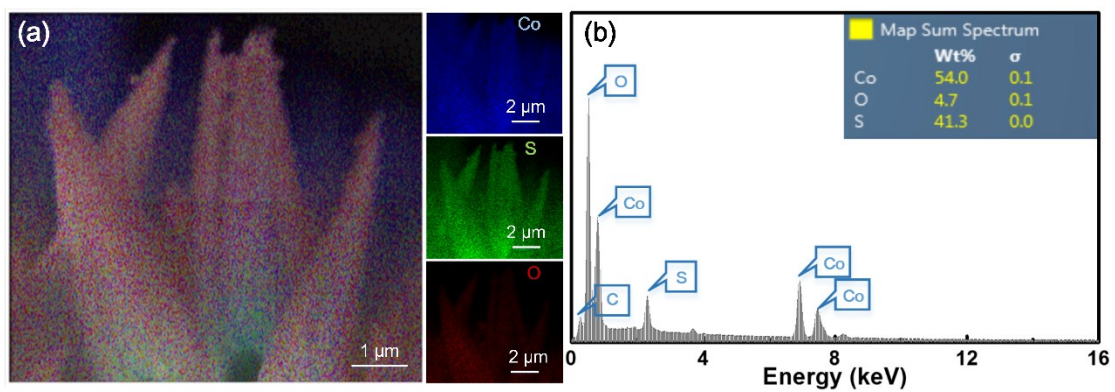

**Figure S2** (a) SEM image of the  $\text{Co}_3\text{O}_4@\text{Co}_3\text{S}_4$  nanostructure and EDS elemental maps of Co, S, and O; (b) EDS elemental spectrum of hybrid NAs.

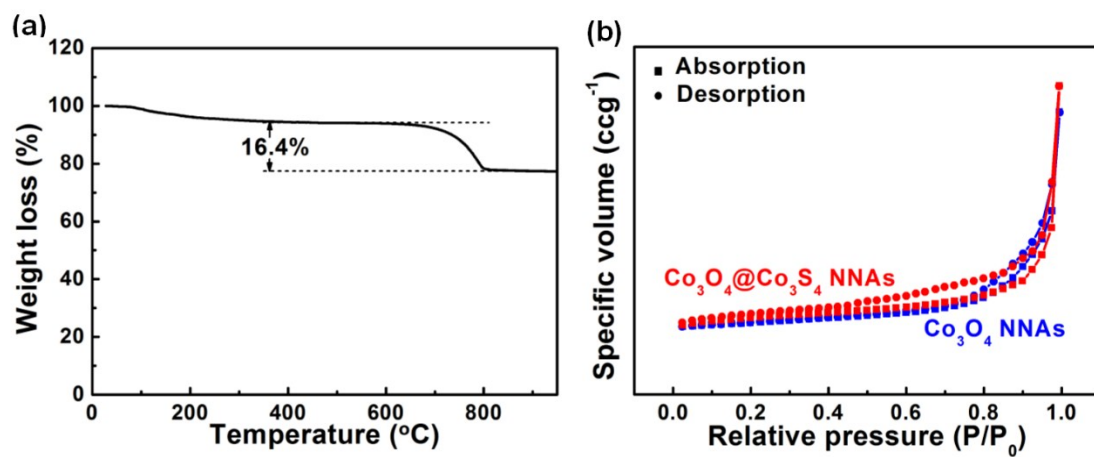

**Figure S3** (a) The TGA profile of the Co<sub>3</sub>O<sub>4</sub>@Co<sub>3</sub>S<sub>4</sub> NNAs; (b) Adsorption-desorption isotherms of the Co<sub>3</sub>O<sub>4</sub> NNAs and Co<sub>3</sub>O<sub>4</sub>@Co<sub>3</sub>S<sub>4</sub> NNAs.

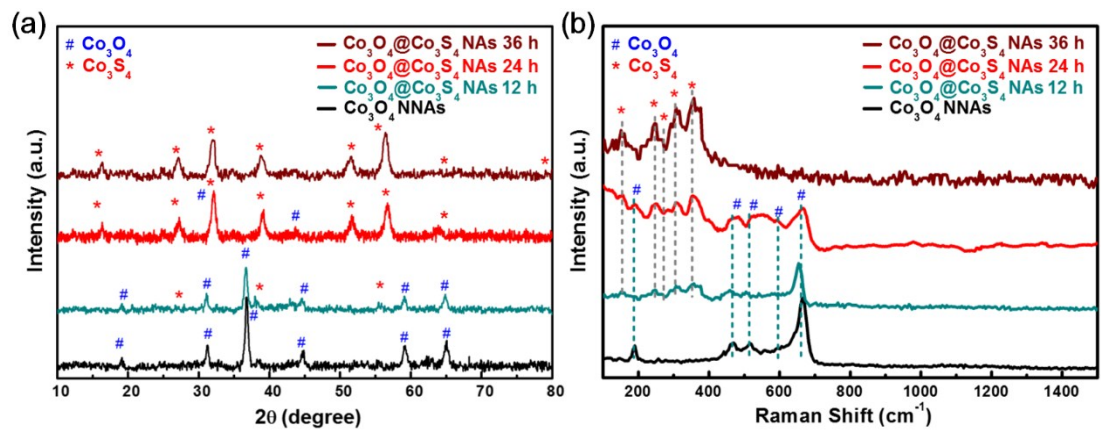

**Figure S4** (a) XRD patterns and (b) Raman spectra of  $\text{Co}_3\text{O}_4$  NNAs,  $\text{Co}_3\text{O}_4@ \text{Co}_3\text{S}_4$  NAs 12h,  $\text{Co}_3\text{O}_4@ \text{Co}_3\text{S}_4$  NAs 24h, and  $\text{Co}_3\text{O}_4@ \text{Co}_3\text{S}_4$  NAs 36h.

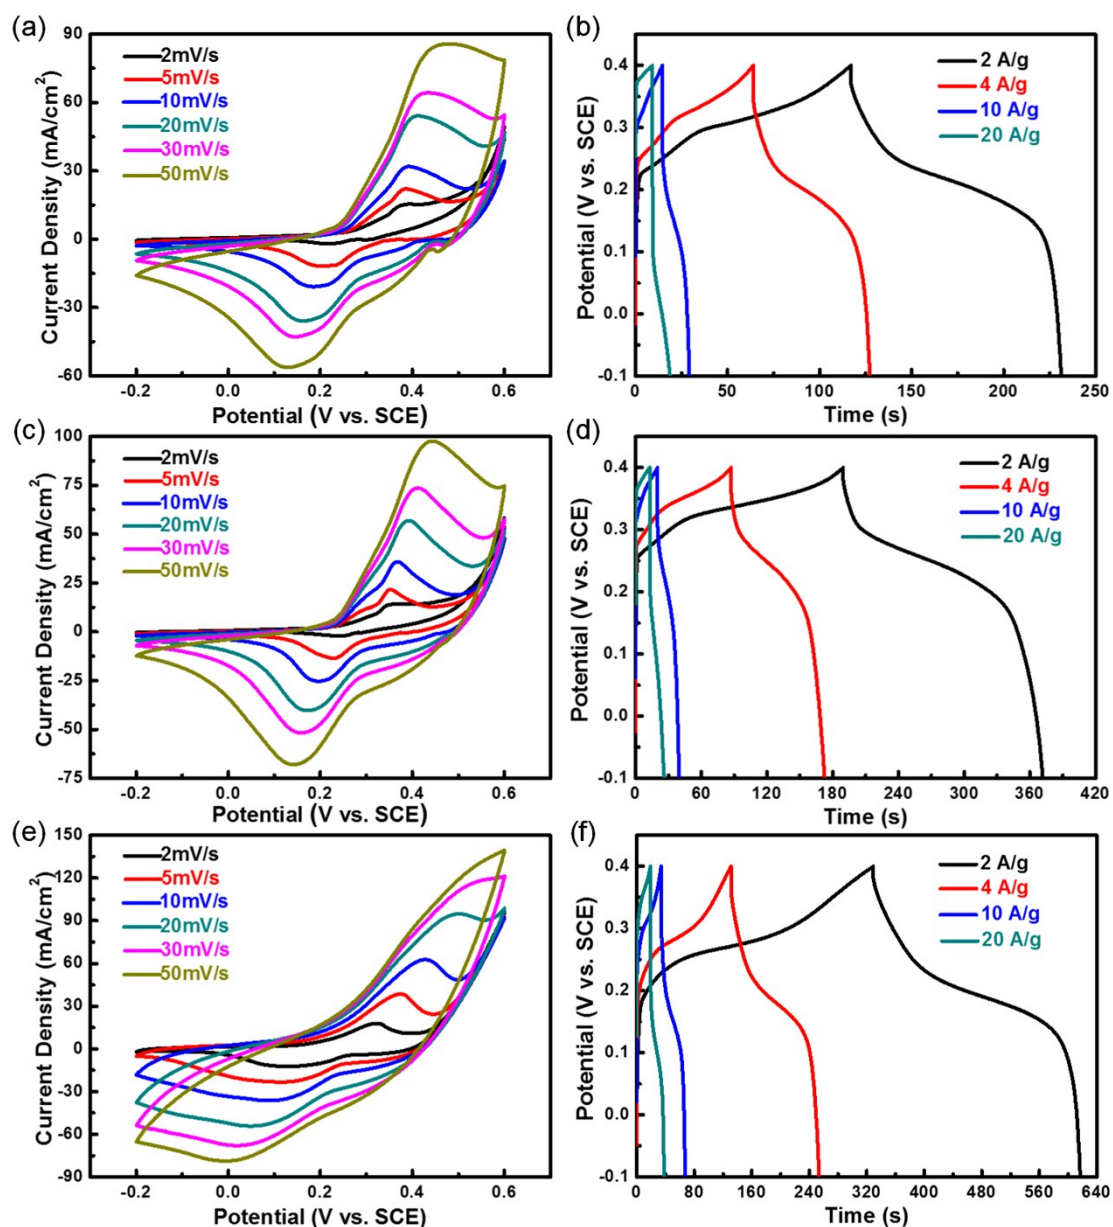

**Figure S5** (a) CV and (b) galvanostatic charge-discharge curves of the Co<sub>3</sub>O<sub>4</sub> NNAs electrode; (c) CV and (d) galvanostatic charge-discharge curves of Co<sub>3</sub>O<sub>4</sub>@Co<sub>3</sub>S<sub>4</sub> NAs prepared at 12 h in the second hydrothermal synthesis process; (e) CV and (d) galvanostatic charge-discharge curves of Co<sub>3</sub>O<sub>4</sub>@Co<sub>3</sub>S<sub>4</sub> NAs prepared at 36 h in the second hydrothermal synthesis process.

**Table 1.** Scan-Rate-Dependent Specific Capacitances (F/g) of the  $\text{Co}_3\text{O}_4$ ,  $\text{Co}_3\text{O}_4@\text{Co}_3\text{S}_4$  12 h,  $\text{Co}_3\text{O}_4@\text{Co}_3\text{S}_4$  24 h, and  $\text{Co}_3\text{O}_4@\text{Co}_3\text{S}_4$  36 h Electrodes

|                                                      | scan rate (mV/s) |       |       |       |       |       |
|------------------------------------------------------|------------------|-------|-------|-------|-------|-------|
|                                                      | 2                | 5     | 10    | 20    | 30    | 50    |
| $\text{Co}_3\text{O}_4$                              | 765.6            | 317.2 | 186.2 | 127.6 | 98.5  | 74.2  |
| $\text{Co}_3\text{O}_4@\text{Co}_3\text{S}_4$ (12 h) | 911.5            | 410.4 | 288.5 | 242.2 | 218.1 | 184.4 |
| $\text{Co}_3\text{O}_4@\text{Co}_3\text{S}_4$ (24 h) | 1284.3           | 631.9 | 425.1 | 311.1 | 283.7 | 206.7 |
| $\text{Co}_3\text{O}_4@\text{Co}_3\text{S}_4$ (36 h) | 1161.5           | 642.7 | 447.9 | 316.7 | 258.9 | 177.4 |

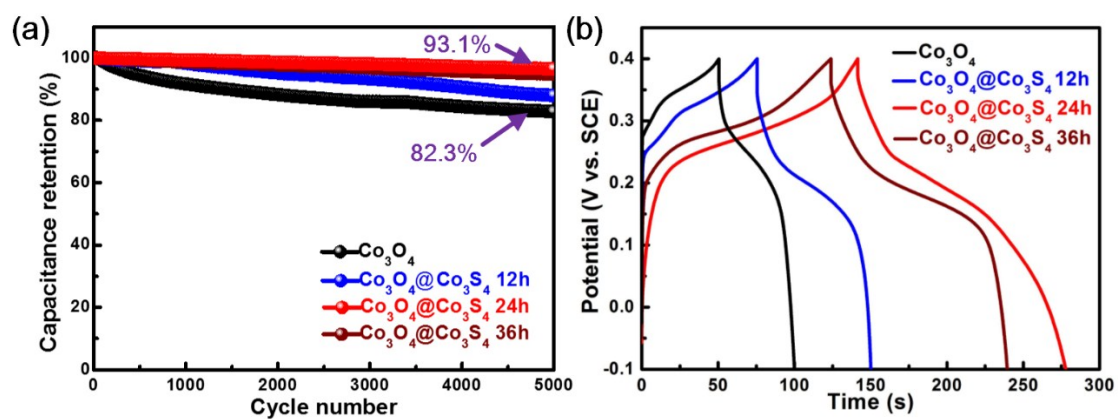

**Figure S6** (a) Cycling performance of the  $\text{Co}_3\text{O}_4$  NNAs and  $\text{Co}_3\text{O}_4@ \text{Co}_3\text{S}_4$  NAs electrodes prepared at different reaction durations in the second hydrothermal synthesis process ; (b) Galvanostatic charging/discharging curves of the last cycle at  $4 \text{ A g}^{-1}$  after 5000 cycles for the  $\text{Co}_3\text{O}_4$  NNAs and  $\text{Co}_3\text{O}_4@ \text{Co}_3\text{S}_4$  NAs electrodes, respectively.



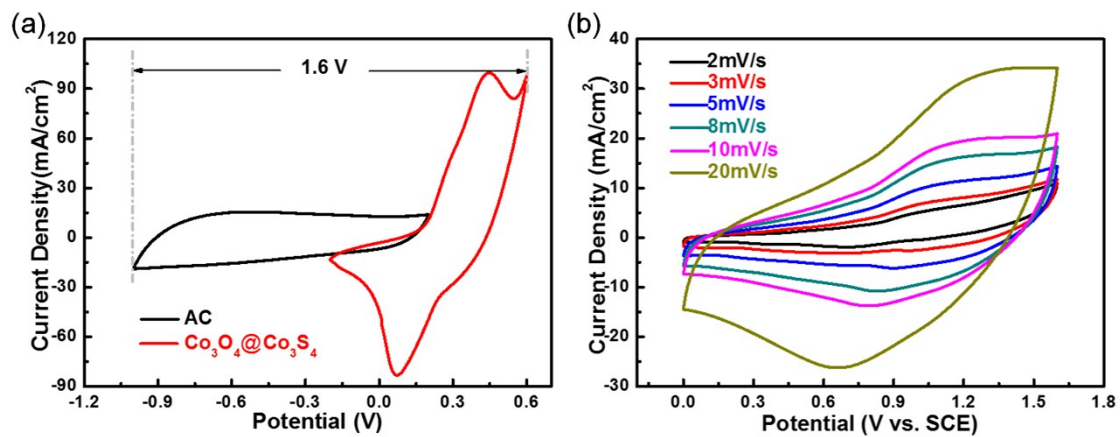

**Figure S7** (a) The CV comparison of the activated carbon electrodes and the  $\text{Co}_3\text{O}_4@\text{Co}_3\text{S}_4$  NAS electrodes in -0.2 to 0.6 V and -1.0 to 0.2 V at a scan rate of  $30 \text{ mV s}^{-1}$ ; (b) CV curves of the  $\text{Co}_3\text{O}_4@\text{Co}_3\text{S}_4//\text{AC}$  ASCs at various scan rates.

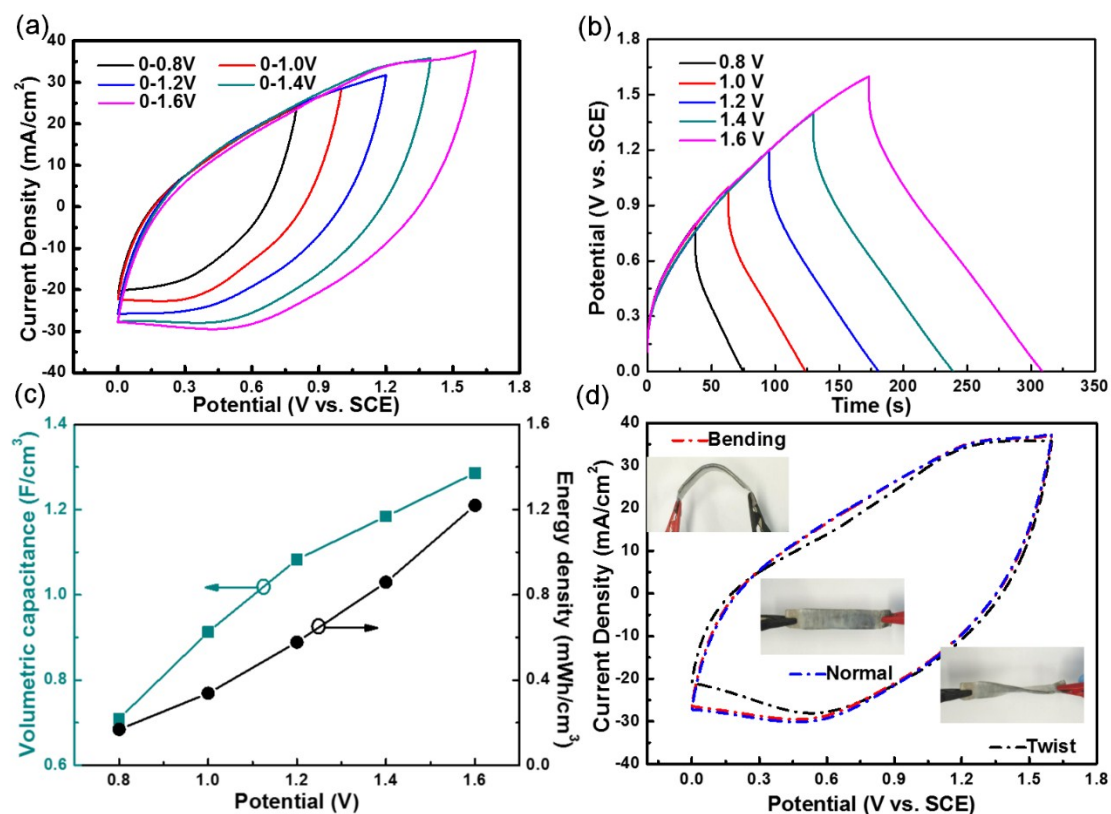

**Figure S8** (a) CV curves of the  $\text{Co}_3\text{O}_4@ \text{Co}_3\text{S}_4// \text{AC}$  ASCs measured at various potential windows with a scan rate of  $20 \text{ mV s}^{-1}$ ; (b) Galvanostatic discharge-charge curves collected at different potential windows for the  $\text{Co}_3\text{O}_4@ \text{Co}_3\text{S}_4// \text{AC}$  ASCs ( $5 \text{ mA cm}^{-2}$ ); (c) Volumetric capacitance calculated from CV and discharge curves as a function of potential window for the  $\text{Co}_3\text{O}_4@ \text{Co}_3\text{S}_4// \text{AC}$  ASCs; (d) CV curves collected at a scan rate of  $20 \text{ mV s}^{-1}$  for the  $\text{Co}_3\text{O}_4@ \text{Co}_3\text{S}_4// \text{AC}$  ASCs under normal, bending, and twist conditions, and the insets of (d) are the device pictures under test conditions.
